# Supplementary material for: Epidemiology of Asbestosis between 2010–2014 and 2015–2019 Periods in Colombia: Descriptive Study
Source: PubMed Central journal article supplement (PMC10453953; doi:10.5334/aogh.3963), 2023-08-22
Supplement: agh-89-1-3963-s1.pdf [file agh-89-1-3963-s1.pdf]

## Supplementary File

**Figure S1.** Asbestosis frequency comparison between 2015–2019 and 2010–2014.

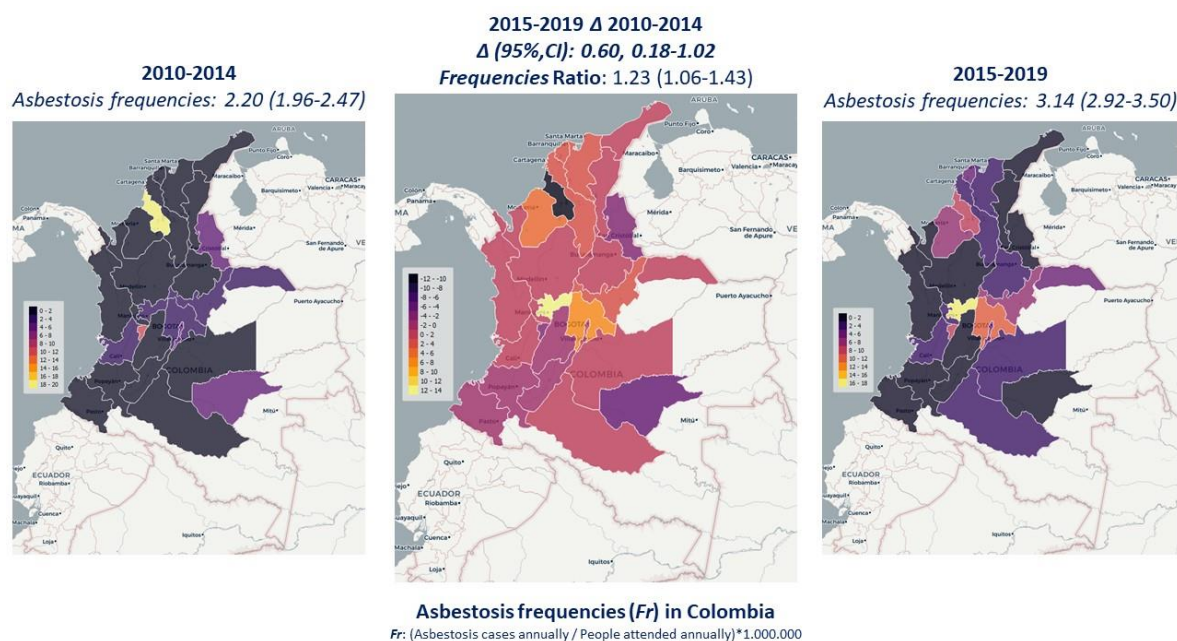

**Table S1.** Semiannually risk of asbestosis in men.

| Period                 | Cases |        | Number of visits |            | Prevalence ratio<br>(95%,CI) |
|------------------------|-------|--------|------------------|------------|------------------------------|
|                        | Male  | Female | Male             | Female     |                              |
| <b>2010-2014</b>       |       |        |                  |            |                              |
| 2010 (first semester)  | 18    | 3      | 5.437.190        | 8.098.986  | 8.94 (2.87-38.0)             |
| 2010 (second semester) | 21    | 5      | 4.840.664        | 7.193.643  | 6.24 (2.46-18.5)             |
| 2011 (first semester)  | 24    | 7      | 6.107.458        | 8.925.609  | 5.01 (2.22-12.5)             |
| 2011 (second semester) | 28    | 1      | 5.671.248        | 8.407.258  | 41.5 (7.86-858.0)            |
| 2012 (first semester)  | 24    | 2      | 6.883.511        | 10.132.109 | 17.6 (4.88-110.9)            |
| 2012 (second semester) | 20    | 3      | 5.789.519        | 8.458.415  | 9.74 (3.17-41.1)             |
| 2013 (first semester)  | 21    | 6      | 6.119.327        | 8.958.679  | 5.12 (2.14-13.8)             |
| 2013 (second semester) | 18    | 2      | 6.716.184        | 9.925.698  | 13.3 (3.56-84.8)             |
| 2014 (first semester)  | 32    | 12     | 7.172.774        | 10.512.798 | 3.91 (2.04-7.87)             |
| 2014 (second semester) | 48    | 13     | 8.454.883        | 11.967.127 | 5.23 (2.88-10.0)             |
| <b>2015-2019</b>       |       |        |                  |            |                              |
| 2015 (first semester)  | 32    | 9      | 8.195.316        | 11.695.877 | 5.07 (2.48-11.2)             |
| 2015 (second semester) | 23    | 2      | 6.325.117        | 9.284.261  | 16.8 (4.64-106.2)            |
| 2016 (first semester)  | 29    | 2      | 6.555.015        | 9.590.615  | 21.2 (5.97-132.0)            |
| 2016 (second semester) | 28    | 2      | 6.551.209        | 9.438.757  | 20.1 (5.64-215.7)            |
| 2017 (first semester)  | 36    | 5      | 7.196.721        | 10.587.218 | 10.5 (4.41-30.4)             |
| 2017 (second semester) | 48    | 1      | 8.372.932        | 12.002.639 | 68.8 (13.4-1403.0)           |
| 2018 (first semester)  | 39    | 6      | 9.288.047        | 13.100.327 | 9.17 (4.08-23.8)             |
| 2018 (second semester) | 36    | 8      | 9.831.486        | 13.709.287 | 6.27 (3.01-14.4)             |
| 2019 (first semester)  | 40    | 5      | 11.077.748       | 15.352.628 | 11.0 (4.66-31.7)             |
| 2019 (second semester) | 73    | 61     | 11.496.313       | 15.814.876 | 1.65 (1.17-2.31)             |

**Number of visits:** Number of visits to the whole health system.
